# Supplementary material
Source: Elsevier journal article supplement (https://pure.iiasa.ac.at/18733/2/mmc1.pdf)
Supplement: mmc1 [file mmc1.pdf]

**One Earth, Volume 6**

## **Supplemental information**

### **Social media data shed light on air-conditioning interest of heat-vulnerable regions and sociodemographic groups**

**Sibel Eker, Alessio Mastrucci, Shonali Pachauri, and Bas van Ruijven**

## Supplemental Information

### Supplemental Figures

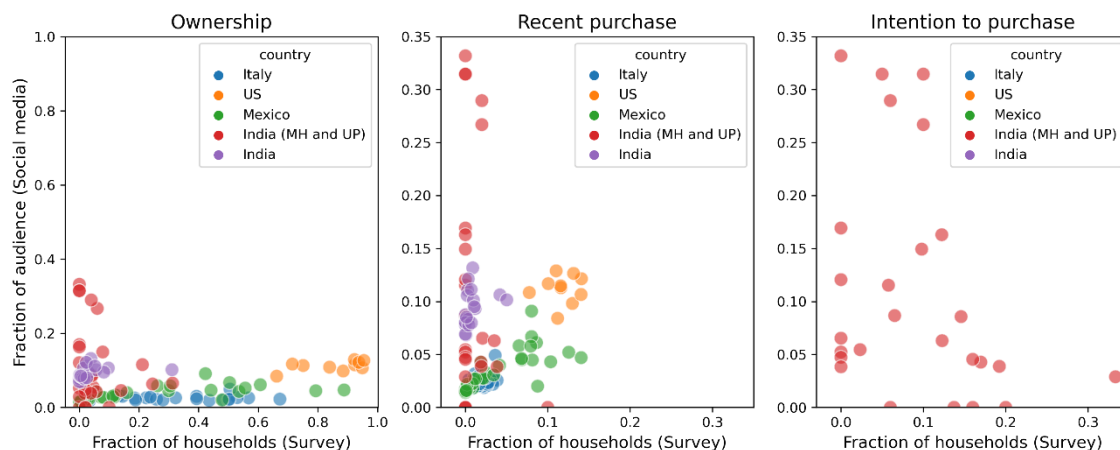

**Figure S1: Social media audience fraction interested in air conditioning (y-axis) vs fraction of households who own, have recently purchased or are intending to purchase air-conditioning (x-axis).** Each dot refers to a state, division, or semi-urban town, depending on the location unit of the corresponding survey indicated by color-coding. Ownership rates exceeds the online interest in air-conditioning, which can be explained by the assumption that households with an AC unit would not engage in online activity for instance for buying an AC unit. Online interest in air-conditioning better correlates with the recent purchases of AC, except in the semi-urban towns of Maharashtra and Uttar Pradesh states of India, where the social media data significantly exceed purchase rates. In these towns, the fraction of households who reported intention to purchase is in a similar order of magnitude with a higher correlation to the social media audience fraction interested in air conditioning.

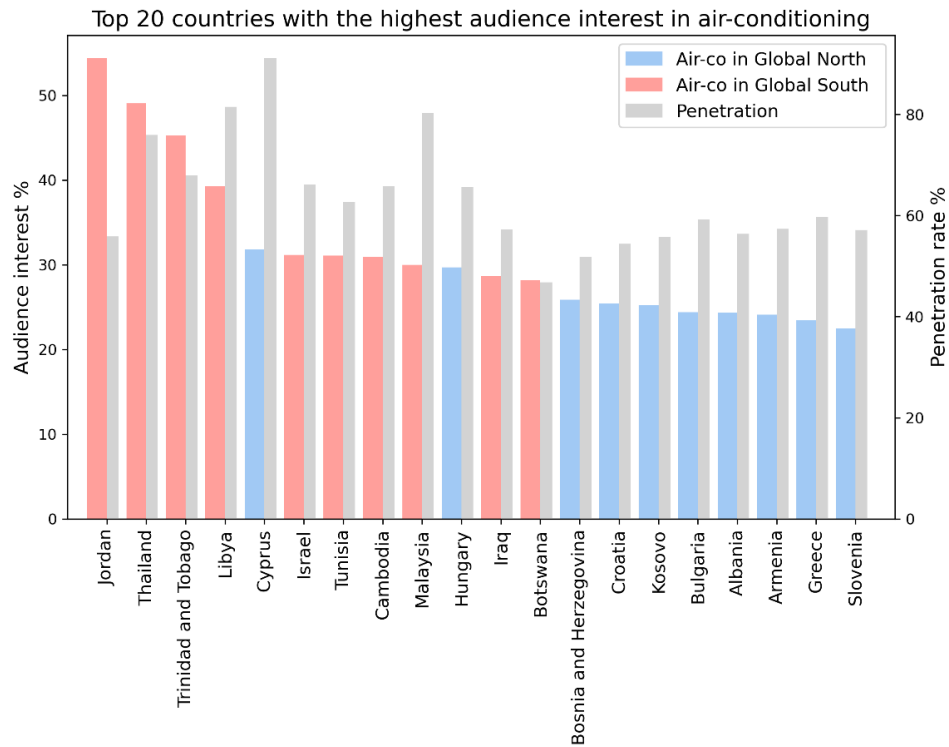

**Figure S2: Top 20 countries with the highest air-conditioning interest (left y-axis) on Facebook and Instagram, and the penetration rates (right y-axis) of social media with respect to the total population.** Complementing Figure 3, this figure shows the top 20 countries in terms of the fraction of Facebook and Instagram audience interested in air-conditioning, ordered from left to right. For each country, the red or blue bar shows the audience fraction, color denoting whether it is a Global North or Global South country. The grey bars show the penetration rates (population active on Facebook and Instagram) across these countries aligned with the right-hand-side axis.

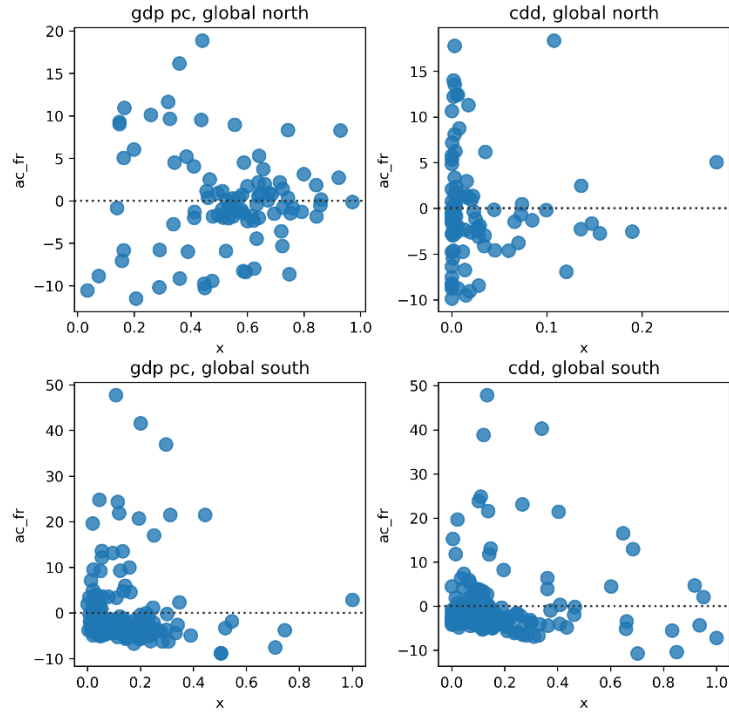

**Figure S3: Residuals of linear regression shown in Fig. 3g-h in Global North and South.** The independent variable of the regression is the social media audience fraction interested in AC (ac\_fr) and the dependent variable is GDP per capita (gdp pc) or cooling degree days (cdd). The scattered residuals indicate that any other form of regression, such as polynomial or logistic, does not represent the distribution of data better.

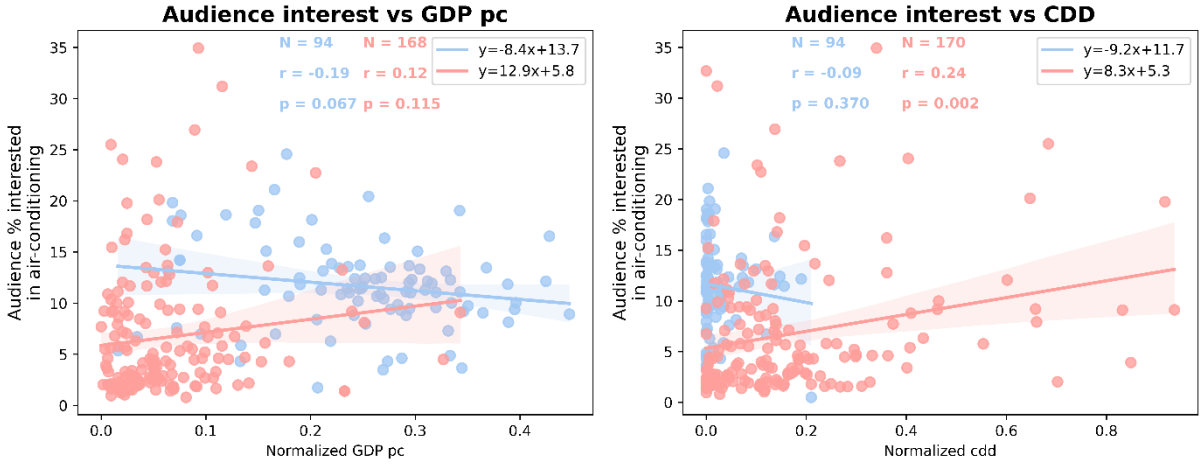

**Figure S4: Linear regression between the audience interest percentage, and the normalized GDP per capita (left) and cooling degree days (CDD, right) after the outliers, that is, the values higher than the 99<sup>th</sup> quantile on both x and y axes are removed.** Compared to Figure 3g and h, where the regression on the full data set is reported, the direction of relationship does not change, yet the statistical significance becomes less. In other words, the positive linear relationship between the audience interested in air-conditioning and GDP per capita in the Global South is not statistically significant, so as the negative linear relationship between the audience interest and CDD in the Global North.

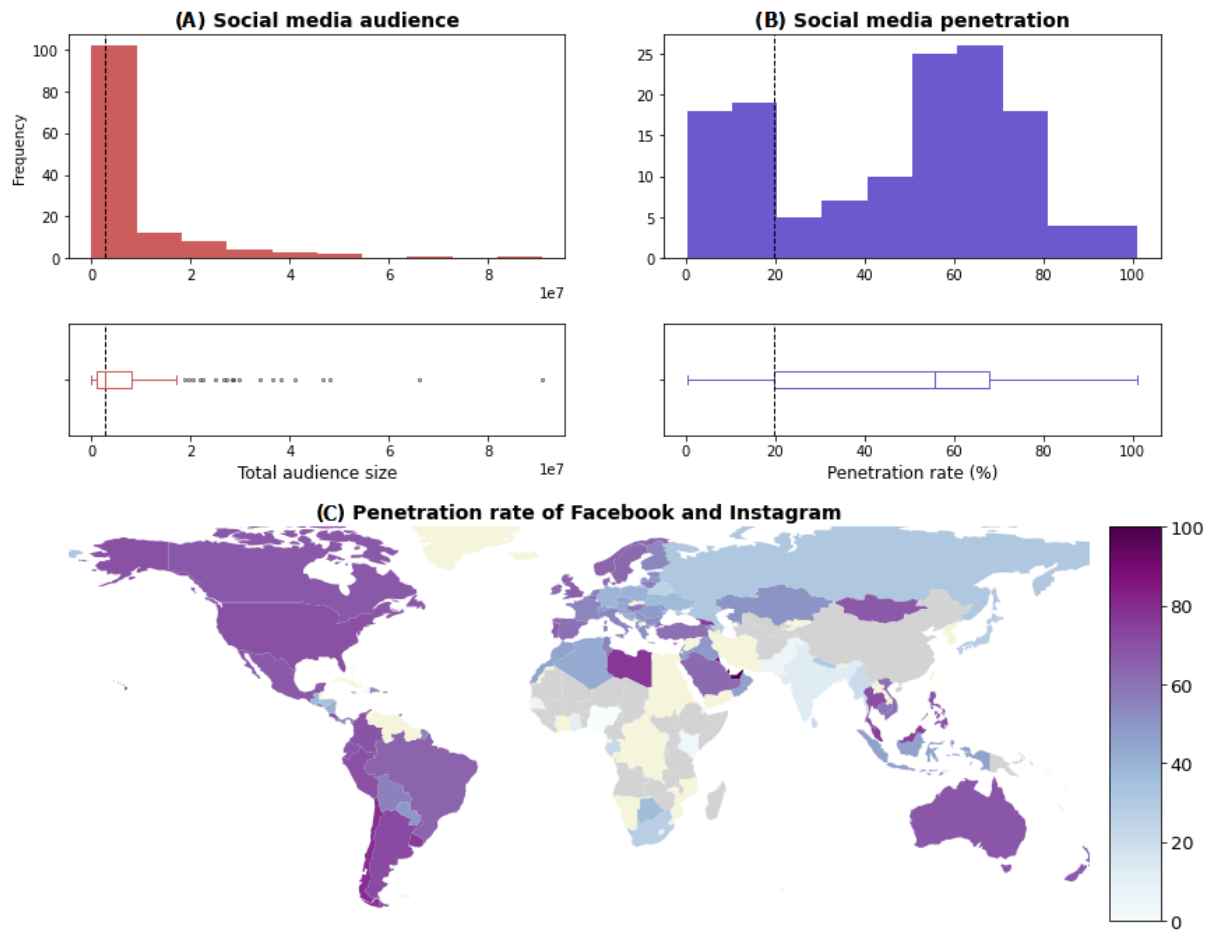

**Figure S5: Audience size and penetration rates of Facebook and Instagram.** (A) Distribution of the audience size across 136 countries in a histogram plot (top) and in an aligned boxplot (bottom). The vertical dashed line shows the 1<sup>st</sup> quartile at 916,652. The countries with lower audience sizes are excluded. (B) Distribution of the penetration rate, vertical dashed line showing the 1<sup>st</sup> quartile at 19.8%. (C) Global map color-coded according to the penetration rates across 136 countries. The countries in light yellow are the ones for which there is no social media data available. The countries in grey are the ones excluded from our analysis due to low penetration rate and audience size, i.e. those to the left of the dashed vertical lines in (A) and (B).

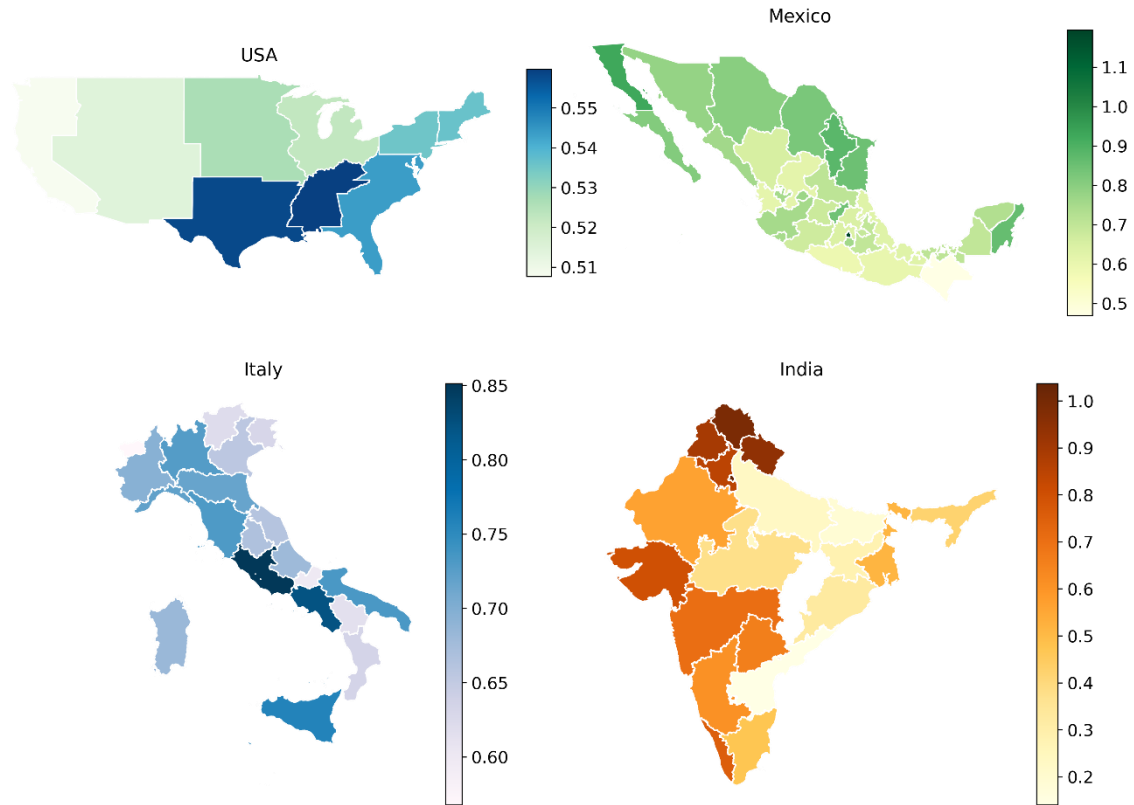

**Figure S6: Penetration rates in the four countries across regions or states. (a)** Across 11 regions of US, the average penetration rate (fraction of the population who is active on Facebook and Instagram) is 53% (50.7 – 56%). The country-level penetration rate is much higher due to mobility and change in location settings on user profiles. **(b)** Across 32 states of Mexico, the average penetration rate is 73.9% (46.9 – 119%). The penetration rate being higher than 100% in Mexico city is attributed to recent permanent or temporary population mobility. **(c)** In Italy, the average penetration rate across 20 regions is 68.8% (56.8 – 85.1%). **(d)** Across 21 states of India, the average penetration rate is 36.4% (14 – 103%). More than 100% social media penetration is attributed to population increase and mobility in Delhi.

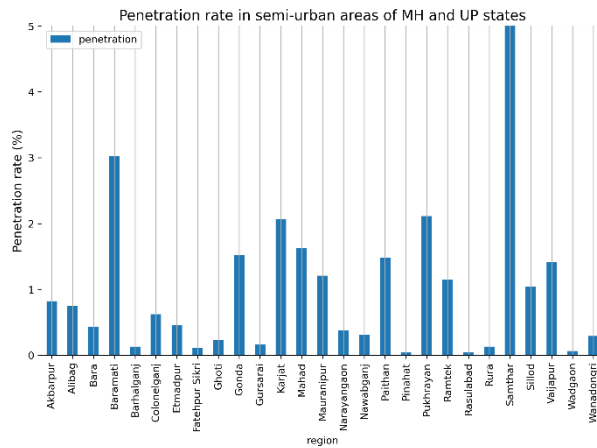

**Figure S7: Penetration rates in the four countries across 27 semi-urban areas in the Maharashtra and Uttar Pradesh states of India.** These penetration rates are calculated with respect to the current (June 2021) social media audience and the estimated population of each town. The population estimate is the actual population of each town in 2011 Census data, adjusted according to the national population increase of India between 2011 and 2021 (11.4%) United Nations, Department of Economic and Social Affairs, Population Division. World Population Prospects: The 2019 Revision.

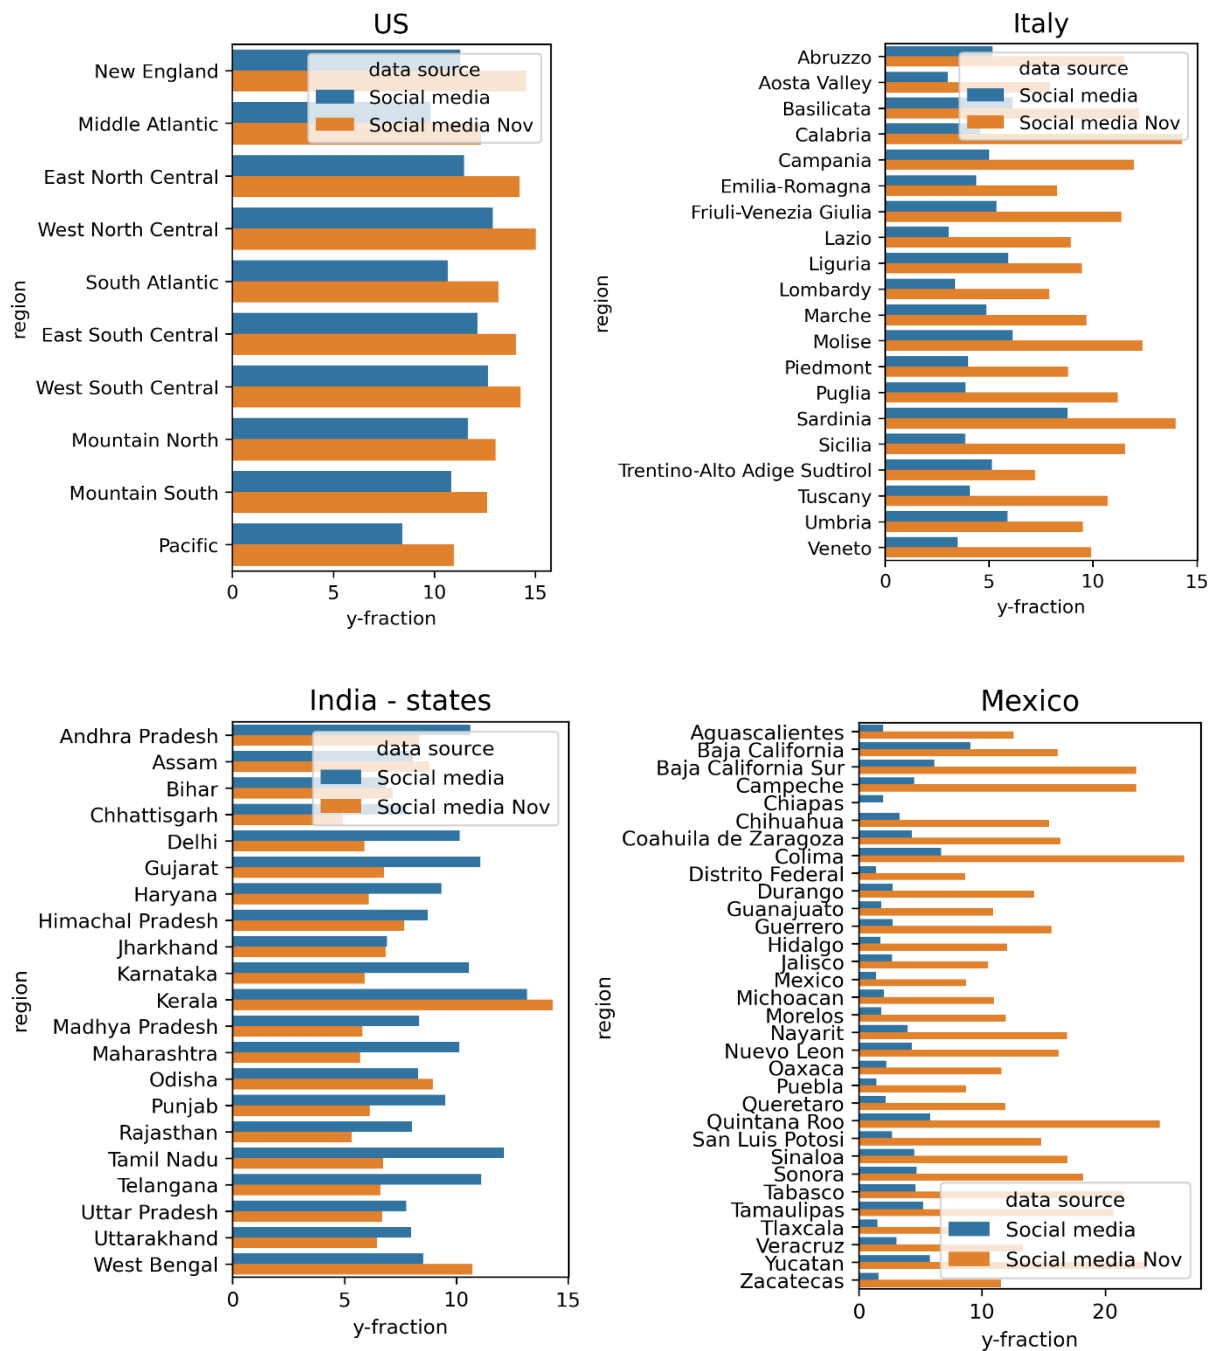

**Figure S8: Comparison of the audience fraction interested in air-conditioning in May-September 2021 (blue) and November 2022 (orange).** The bars refer to the percentage of social media audience fraction interested in air-conditioning in the divisions or states of the four countries.

## Supplemental Tables

*Table S1: List of Global North and Global South countries*

| Global North (GN) countries                                                                                                                                                                                                                                                                                                                                                                                                                                                                                                                                                                                                                       | Global South (GS) countries                                                                                                                                                                                                                                                                                                                                                                                                                                                                                                                                                                                                                                                                                                                                                                                                                                                                                                                                                                                                                                                                                                                                                                                                                                                                                                                                                                                                                                                                                                            |
|---------------------------------------------------------------------------------------------------------------------------------------------------------------------------------------------------------------------------------------------------------------------------------------------------------------------------------------------------------------------------------------------------------------------------------------------------------------------------------------------------------------------------------------------------------------------------------------------------------------------------------------------------|----------------------------------------------------------------------------------------------------------------------------------------------------------------------------------------------------------------------------------------------------------------------------------------------------------------------------------------------------------------------------------------------------------------------------------------------------------------------------------------------------------------------------------------------------------------------------------------------------------------------------------------------------------------------------------------------------------------------------------------------------------------------------------------------------------------------------------------------------------------------------------------------------------------------------------------------------------------------------------------------------------------------------------------------------------------------------------------------------------------------------------------------------------------------------------------------------------------------------------------------------------------------------------------------------------------------------------------------------------------------------------------------------------------------------------------------------------------------------------------------------------------------------------------|
| Albania, Bulgaria, Bosnia and Herzegovina, Czech Republic, Estonia, Croatia, Hungary, Lithuania, Latvia, The former Yugoslav Republic of Macedonia, Montenegro, Poland, Romania, Serbia, Slovakia, Slovenia, Kosovo, Armenia, Azerbaijan, Belarus, Georgia, Kazakhstan, Kyrgyzstan, Moldova, Russia, Tajikistan, Turkmenistan, Ukraine, Uzbekistan, Canada, Puerto Rico, United States, Australia, Japan, New Zealand, Andorra, Austria, Belgium, Switzerland, Cyprus, Germany, Denmark, Spain, Finland, France, United Kingdom, Greece, Ireland, Iceland, Italy, Liechtenstein, Luxembourg, Malta, Netherlands, Norway, Portugal, Sweden, Turkey | Angola, Burundi, Benin, Burkina Faso, Botswana, Central African Republic, Cote d'Ivoire, Cameroon, Democratic Republic of the Congo, Congo, Comoros, Cape Verde, Djibouti, Eritrea, Western Sahara, Ethiopia, Gabon, Ghana, Guinea, Gambia, Guinea-Bissau, Equatorial Guinea, Kenya, Liberia, Lesotho, Madagascar, Mali, Mozambique, Mauritania, Mauritius, Malawi, Namibia, Niger, Nigeria, Rwanda, Senegal, Sierra Leone, Somalia, Swaziland, Seychelles, Chad, Togo, Tanzania, Uganda, South Africa, Zambia, Zimbabwe, China, Cambodia, Lao People's Democratic Republic, Mongolia, Dem People's Rep of Korea, Vietnam, Argentina, Antigua and Barbuda, Belize, Bolivia, Brazil, Barbados, Chile, Colombia, Costa Rica, Cuba, Dominica, Dominican Republic, Ecuador, Grenada, Guatemala, French Guiana, Guyana, Honduras, Haiti, Jamaica, Saint Kitts and Nevis, Saint Lucia, Mexico, Nicaragua, Panama, Peru, Paraguay, El Salvador, Sao Tome and Principe, Suriname, Trinidad and Tobago, Uruguay, Saint Vincent and the Grenadines, Venezuela, United Arab Emirates, Bahrain, Algeria, Egypt, Iran (Islamic Republic of), Iraq, Israel, Jordan, Kuwait, Lebanon, Libya, Morocco, Oman, Palestinian Territories, Qatar, Saudi Arabia, South Sudan, Syrian Arab Republic, Tunisia, Yemen, Brunei Darussalam, Fiji, Indonesia, Republic of Korea, Myanmar, Malaysia, Philippines, Papua New Guinea, Singapore, Thailand, Timor-Leste, Taiwan, Vanuatu, Afghanistan, Bangladesh, Bhutan, India, Sri Lanka, Maldives, Nepal, Pakistan |

*Table S2: Summary statistics of the social media audience fraction interested in air-conditioning across 113 countries (as the average of two data collection points in two seasons) and the states of US, India, Brazil, and Mexico*

| Attribute | Range  | Region        | mean  | median | q25  | q75   | std  | n   |
|-----------|--------|---------------|-------|--------|------|-------|------|-----|
| Gender    | female | Global North  | 11.74 | 10.99  | 5.80 | 15.97 | 7.01 | 46  |
| Gender    | both   | Global North  | 12.47 | 11.89  | 7.13 | 17.53 | 6.24 | 46  |
| Gender    | male   | Global North  | 14.14 | 13.88  | 8.34 | 19.01 | 6.47 | 46  |
| Gender    | female | Global South  | 11.98 | 9.93   | 6.13 | 14.81 | 8.70 | 68  |
| Gender    | both   | Global South  | 13.07 | 10.62  | 7.88 | 15.48 | 8.67 | 68  |
| Gender    | male   | Global South  | 14.15 | 12.01  | 9.15 | 17.10 | 8.90 | 68  |
| Gender    | female | All countries | 11.88 | 10.64  | 5.95 | 15.49 | 8.03 | 114 |
| Gender    | both   | All countries | 12.83 | 11.20  | 7.69 | 16.59 | 7.76 | 114 |
| Gender    | male   | All countries | 14.15 | 13.05  | 8.78 | 17.92 | 7.98 | 114 |
| Age       | 65-65+ | Global North  | 14.59 | 13.65  | 8.70 | 18.85 | 7.10 | 43  |

|              |                            |               |       |       |       |       |       |     |
|--------------|----------------------------|---------------|-------|-------|-------|-------|-------|-----|
| Age          | 18-34                      | Global North  | 9.85  | 8.53  | 5.22  | 12.52 | 6.48  | 45  |
| Age          | 35-64                      | Global North  | 16.75 | 15.24 | 11.13 | 23.57 | 8.22  | 43  |
| Age          | 65-65+                     | Global South  | 14.29 | 12.89 | 8.60  | 18.15 | 8.53  | 64  |
| Age          | 18-34                      | Global South  | 10.80 | 8.28  | 5.73  | 13.73 | 7.72  | 68  |
| Age          | 35-64                      | Global South  | 16.57 | 13.08 | 9.78  | 20.15 | 11.03 | 68  |
| Age          | 65-65+                     | All countries | 14.41 | 13.15 | 8.58  | 18.34 | 7.95  | 107 |
| Age          | 18-34                      | All countries | 10.42 | 8.39  | 5.30  | 13.64 | 7.24  | 113 |
| Age          | 35-64                      | All countries | 16.64 | 14.11 | 10.17 | 23.44 | 9.99  | 111 |
| Education    | 3 Bachelors                | Global North  | 15.36 | 13.76 | 10.89 | 19.54 | 7.66  | 45  |
| Education    | 1 Less than high school    | Global North  | 12.91 | 12.43 | 9.43  | 16.21 | 6.07  | 46  |
| Education    | 2 High school              | Global North  | 14.19 | 13.32 | 9.82  | 18.05 | 6.81  | 46  |
| Education    | 4 Masters and PhD          | Global North  | 14.57 | 12.60 | 7.51  | 19.14 | 8.30  | 46  |
| Education    | 3 Bachelors                | Global South  | 16.49 | 13.62 | 9.05  | 20.23 | 10.81 | 68  |
| Education    | 1 Less than high school    | Global South  | 15.03 | 11.52 | 7.98  | 18.00 | 10.28 | 68  |
| Education    | 2 High school              | Global South  | 14.16 | 11.30 | 7.81  | 17.29 | 9.71  | 67  |
| Education    | 4 Masters and PhD          | Global South  | 18.88 | 14.49 | 11.46 | 22.75 | 12.52 | 68  |
| Education    | 3 Bachelors                | All countries | 16.04 | 13.63 | 9.36  | 20.02 | 9.66  | 113 |
| Education    | 1 Less than high school    | All countries | 14.18 | 11.93 | 8.22  | 16.92 | 8.86  | 114 |
| Education    | 2 High school              | All countries | 14.17 | 12.60 | 8.05  | 17.70 | 8.61  | 113 |
| Education    | 4 Masters and PhD          | All countries | 17.14 | 14.10 | 10.29 | 21.20 | 11.17 | 114 |
| Relationship | all                        | Global North  | 18.21 | 16.50 | 12.88 | 22.03 | 7.66  | 46  |
| Relationship | married or living together | Global North  | 26.36 | 25.18 | 18.44 | 31.66 | 10.98 | 46  |
| Relationship | all                        | Global South  | 16.11 | 15.67 | 11.24 | 19.88 | 7.93  | 68  |
| Relationship | married or living together | Global South  | 25.88 | 24.65 | 18.55 | 30.75 | 12.06 | 67  |
| Relationship | all                        | All countries | 16.95 | 16.11 | 11.96 | 20.71 | 7.85  | 114 |
| Relationship | married or living together | All countries | 26.07 | 24.90 | 18.33 | 31.11 | 11.58 | 113 |
| Family       | all                        | Global North  | 18.30 | 16.79 | 12.64 | 22.32 | 7.68  | 45  |
| Family       | parents of 9-18 yrs old    | Global North  | 37.96 | 35.18 | 23.87 | 51.21 | 17.10 | 44  |
| Family       | parents of 0-8 yrs old     | Global North  | 42.56 | 39.68 | 22.49 | 56.92 | 22.67 | 45  |
| Family       | all                        | Global South  | 18.10 | 17.94 | 13.14 | 20.94 | 7.60  | 49  |
| Family       | parents of 9-18 yrs old    | Global South  | 46.35 | 42.43 | 36.72 | 54.17 | 15.33 | 49  |
| Family       | parents of 0-8 yrs old     | Global South  | 49.58 | 45.69 | 34.34 | 61.68 | 19.41 | 48  |
| Family       | all                        | All countries | 18.20 | 17.31 | 13.06 | 21.15 | 7.60  | 94  |
| Family       | parents of 9-18 yrs old    | All countries | 42.38 | 41.44 | 29.90 | 53.54 | 16.64 | 93  |
| Family       | parents of 0-8 yrs old     | All countries | 46.18 | 43.95 | 29.60 | 60.69 | 21.23 | 93  |

*Table S3: List of the countries in three regions with high AC interest*

| <b>Eastern Europe (EEU)</b> | <b>Middle East and North Africa (MEA)</b> | <b>Pacific Asia (PAS)</b> |
|-----------------------------|-------------------------------------------|---------------------------|
| Albania                     | United Arab Emirates                      | Brunei Darussalam         |
| Bulgaria                    | Bahrain                                   | Fiji                      |
| Bosnia and Herzegovina      | Algeria                                   | Indonesia                 |
| Czech Republic              | Egypt                                     | Republic of Korea         |
| Estonia                     | Iraq                                      | Myanmar                   |

|            |                      |                  |
|------------|----------------------|------------------|
| Croatia    | Israel               | Malaysia         |
| Hungary    | Jordan               | Philippines      |
| Lithuania  | Kuwait               | Papua New Guinea |
| Latvia     | Lebanon              | Singapore        |
| Montenegro | Morocco              | Thailand         |
| Poland     | Oman                 | Taiwan           |
| Romania    | Qatar                | Vanuatu          |
| Serbia     | Saudi Arabia         |                  |
| Slovakia   | Syrian Arab Republic |                  |
| Slovenia   | Tunisia              |                  |
|            | Yemen                |                  |
|            | South Sudan          |                  |

**Table S4: Summary statistics of the social media audience fraction interested in air-conditioning (as the average of two data collection points in two seasons) in Eastern Europe (EEU), Middle East and North Africa (MEA) and Pacific Asia (PAS)**

| Attribute | Range                   | Region | mean     | median   | q25      | q75      | std      | n  |
|-----------|-------------------------|--------|----------|----------|----------|----------|----------|----|
| Gender    | female                  | EEU    | 15.3222  | 15.02516 | 10.78096 | 17.62081 | 6.629055 | 14 |
| Gender    | both                    | EEU    | 16.02535 | 17.22459 | 13.13131 | 18.63426 | 4.134078 | 14 |
| Gender    | male                    | EEU    | 18.68751 | 19.3623  | 15.62274 | 21.48043 | 4.715704 | 14 |
| Gender    | female                  | PAS    | 16.64649 | 17.61911 | 9.721581 | 20.25512 | 11.44363 | 7  |
| Gender    | both                    | PAS    | 17.47869 | 18.18983 | 10.70603 | 22.44923 | 11.07297 | 7  |
| Gender    | male                    | PAS    | 18.35244 | 18.65056 | 11.50324 | 25.09163 | 10.99805 | 7  |
| Gender    | female                  | MEA    | 15.03659 | 12.31956 | 6.834755 | 19.91974 | 10.57124 | 14 |
| Gender    | both                    | MEA    | 17.39975 | 15.11852 | 9.122109 | 22.08414 | 10.54707 | 14 |
| Gender    | male                    | MEA    | 18.98919 | 16.38359 | 10.42102 | 23.60485 | 10.68837 | 14 |
| Gender    | female                  | AFR    | 10.52733 | 7.786258 | 6.809199 | 11.57027 | 7.518428 | 17 |
| Gender    | both                    | AFR    | 11.3309  | 9.405761 | 8.604397 | 12.04493 | 7.41771  | 17 |
| Gender    | male                    | AFR    | 12.56063 | 10.77681 | 9.981157 | 13.34467 | 7.805682 | 17 |
| Age       | 65-65+                  | EEU    | 17.02921 | 16.96252 | 12.82667 | 21.21374 | 6.113819 | 13 |
| Age       | 18-34                   | EEU    | 14.91802 | 14.36054 | 9.008085 | 17.80458 | 7.540613 | 14 |
| Age       | 35-64                   | EEU    | 21.1454  | 23.58618 | 15.80149 | 25.35764 | 6.922394 | 14 |
| Age       | 65-65+                  | PAS    | 18.69978 | 22.20893 | 16.58139 | 23.37018 | 8.167831 | 7  |
| Age       | 18-34                   | PAS    | 14.88311 | 14.77983 | 8.906887 | 18.11138 | 10.2965  | 7  |
| Age       | 35-64                   | PAS    | 23.55605 | 27.83778 | 16.1671  | 29.64825 | 13.01667 | 7  |
| Age       | 65-65+                  | MEA    | 20.28731 | 19.99453 | 12.29995 | 24.54497 | 10.67582 | 12 |
| Age       | 18-34                   | MEA    | 14.17345 | 12.42915 | 7.205446 | 17.9456  | 8.993583 | 14 |
| Age       | 35-64                   | MEA    | 23.27403 | 18.51646 | 12.28947 | 28.47226 | 13.95399 | 14 |
| Age       | 65-65+                  | AFR    | 12.90335 | 12.91657 | 7.057524 | 14.61266 | 8.185631 | 17 |
| Age       | 18-34                   | AFR    | 8.887124 | 8.164638 | 4.382568 | 8.413432 | 7.161216 | 17 |
| Age       | 35-64                   | AFR    | 12.34479 | 10.69346 | 7.047403 | 12.95708 | 8.489357 | 17 |
| Education | 3 Bachelors             | EEU    | 19.71349 | 19.75424 | 13.77672 | 23.31429 | 7.30674  | 14 |
| Education | 2 High school           | EEU    | 18.48616 | 18.53225 | 13.78849 | 21.72044 | 6.408485 | 14 |
| Education | 1 Less than high school | EEU    | 16.3626  | 15.74665 | 12.69989 | 19.64605 | 5.859734 | 14 |
| Education | 4 Masters and PhD       | EEU    | 19.29521 | 17.54113 | 13.74768 | 25.11299 | 8.31389  | 14 |
| Education | 3 Bachelors             | PAS    | 23.38674 | 27.90747 | 14.74571 | 29.96211 | 13.99643 | 7  |
| Education | 2 High school           | PAS    | 19.06939 | 22.73372 | 10.1226  | 25.05622 | 12.28364 | 7  |
| Education | 1 Less than high school | PAS    | 21.312   | 19.995   | 16.1981  | 26.42205 | 12.06555 | 7  |
| Education | 4 Masters and PhD       | PAS    | 27.27045 | 27.80688 | 14.9629  | 39.17363 | 17.67128 | 7  |
| Education | 3 Bachelors             | MEA    | 22.41786 | 21.53017 | 14.33925 | 26.16561 | 11.91445 | 14 |
| Education | 2 High school           | MEA    | 19.7672  | 18.59054 | 12.67768 | 22.70114 | 10.21353 | 14 |
| Education | 1 Less than high school | MEA    | 17.6846  | 16.2233  | 11.97884 | 19.98048 | 8.690577 | 14 |
| Education | 4 Masters and PhD       | MEA    | 23.50866 | 21.00203 | 14.3142  | 28.68164 | 12.72757 | 14 |

|              |                            |     |          |          |          |          |          |    |
|--------------|----------------------------|-----|----------|----------|----------|----------|----------|----|
| Education    | 3 Bachelors                | AFR | 11.51853 | 10.42133 | 7.176567 | 11.47172 | 8.739651 | 17 |
| Education    | 2 High school              | AFR | 9.453198 | 8.205438 | 4.934228 | 9.513345 | 8.128578 | 17 |
| Education    | 1 Less than high school    | AFR | 14.74436 | 10.57031 | 6.439108 | 18.21417 | 12.14812 | 17 |
| Education    | 4 Masters and PhD          | AFR | 14.10124 | 13.21581 | 8.950803 | 14.31825 | 9.370075 | 17 |
| Relationship | all                        | EEU | 19.65615 | 16.50204 | 14.74042 | 25.02101 | 7.352578 | 14 |
| Relationship | married or living together | EEU | 26.95004 | 25.53744 | 21.01644 | 29.60581 | 9.309353 | 14 |
| Relationship | all                        | PAS | 16.04781 | 18.33225 | 10.34725 | 21.95687 | 8.467937 | 7  |
| Relationship | married or living together | PAS | 26.98589 | 31.77214 | 14.54069 | 35.86341 | 16.00709 | 6  |
| Relationship | all                        | MEA | 20.07037 | 18.08933 | 17.30357 | 23.22641 | 7.275905 | 14 |
| Relationship | married or living together | MEA | 29.39996 | 27.99024 | 24.42681 | 30.06013 | 12.66248 | 14 |
| Relationship | all                        | AFR | 13.05026 | 9.704341 | 7.907681 | 14.02285 | 9.432412 | 17 |
| Relationship | married or living together | AFR | 21.56151 | 20.85003 | 13.42046 | 26.3053  | 12.56756 | 17 |
| Family       | all                        | EEU | 19.72301 | 16.50204 | 14.74042 | 25.02127 | 7.346253 | 14 |
| Family       | parents of 9-18 yrs old    | EEU | 40.93445 | 36.72223 | 25.38711 | 54.08741 | 17.38716 | 14 |
| Family       | parents of 0-8 yrs old     | EEU | 48.32356 | 45.38572 | 26.4059  | 69.5658  | 21.68732 | 14 |
| Family       | all                        | PAS | 17.76695 | 19.84571 | 15.73604 | 22.33525 | 7.858897 | 6  |
| Family       | parents of 9-18 yrs old    | PAS | 46.4557  | 51.65871 | 44.17689 | 54.97868 | 18.08481 | 6  |
| Family       | parents of 0-8 yrs old     | PAS | 47.37854 | 50.41734 | 44.79904 | 58.80463 | 18.39881 | 6  |
| Family       | all                        | MEA | 20.25017 | 18.07863 | 17.21507 | 23.56921 | 9.000221 | 9  |
| Family       | parents of 9-18 yrs old    | MEA | 45.02887 | 42.27792 | 36.72485 | 47.78582 | 14.44847 | 9  |
| Family       | parents of 0-8 yrs old     | MEA | 52.20998 | 45.27609 | 40.16661 | 59.18929 | 17.93148 | 9  |
| Family       | all                        | AFR | 17.7492  | 14.57473 | 10.70244 | 20.78841 | 11.84869 | 8  |
| Family       | parents of 9-18 yrs old    | AFR | 57.88733 | 64.68241 | 41.23898 | 73.24521 | 19.63665 | 8  |
| Family       | parents of 0-8 yrs old     | AFR | 58.91266 | 50       | 41.97587 | 78.44175 | 27.61471 | 7  |

**Table S5: Correlation coefficients and Wilcoxon signed-rank test results for the comparison of social media and survey data in four countries (as in Figure 1)**

|                          | Pearson  | Spearman | Kendall      | Wilcoxon statistic | Wilcoxon p-value |
|--------------------------|----------|----------|--------------|--------------------|------------------|
| <b>US</b>                | 0.076334 | 0.10303  | 0.022222222  | 25                 | 0.845703125      |
| <b>India - MH and UP</b> | 0.091022 | -0.02523 | -0.025702886 | 121                | 0.173083961      |
| <b>India - states</b>    | -0.22139 | -0.15325 | -0.133333333 | 2                  | 2.86102E-06      |
| <b>Mexico</b>            | 0.559136 | 0.721265 | 0.570294336  | 33                 | 1.4957E-06       |
| <b>Italy</b>             | 0.157208 | 0.124812 | 0.073684211  | 0                  | 1.90735E-06      |

**Table S6: Wilcoxon signed-rank test results for the effect of demographic factors on AC interest (social media data) and AC purchases (surveys) in four countries (as in Figure 2)**

| Country | Data source  | Attribute/Alternative hypothesis | Test statistic | p-value  |
|---------|--------------|----------------------------------|----------------|----------|
| US      | Social media | Gender                           | 55             | 0.000977 |
| US      | Survey       | Gender                           | 25             | 0.615234 |
| US      | Social media | Age18>35                         | 0              | 1        |
| US      | Social media | Age35>65                         | 0              | 1        |
| US      | Survey       | Age18>35                         | 34             | 0.27832  |
| US      | Survey       | Age35>65                         | 49             | 0.013672 |
| US      | Social media | Education edu2>edu1              | 41             | 0.09668  |
| US      | Social media | Education edu3>edu2              | 0              | 1        |
| US      | Survey       | Education edu2>edu1              | 34             | 0.27832  |
| US      | Survey       | Education edu3>edu2              | 30             | 0.422852 |
| Italy   | Social media | Gender                           | 210            | 9.54E-07 |
| Italy   | Survey       | Gender                           | 165            | 0.011975 |
| Italy   | Social media | Age18>35                         | 0              | 1        |
| Italy   | Social media | Age35>65                         | 8              | 0.999982 |
| Italy   | Survey       | Age18>35                         | 167            | 0.009617 |
| Italy   | Survey       | Age35>65                         | 188            | 0.000508 |
| Italy   | Social media | Education edu2>edu1              | 64             | 0.938454 |

|                   |              |                     |      |          |
|-------------------|--------------|---------------------|------|----------|
| Italy             | Social media | Education edu3>edu2 | 135  | 0.138678 |
| Italy             | Survey       | Education edu2>edu1 | 169  | 0.007656 |
| Italy             | Survey       | Education edu3>edu2 | 120  | 0.29791  |
| India - states    | Social media | Gender              | 169  | 1.14E-05 |
| India - states    | Survey       | Gender              | 48   | 0.849473 |
| India - states    | Social media | Age18>35            | 2    | 0.999996 |
| India - states    | Social media | Age35>65            | 165  | 0.001671 |
| India - states    | Survey       | Age18>35            | 33   | 0.681065 |
| India - states    | Survey       | Age35>65            | 55   | 0.02523  |
| India - states    | Social media | Education edu2>edu1 |      |          |
| India - states    | Social media | Education edu3>edu2 | 230  | 9.54E-07 |
| India - states    | Survey       | Education edu2>edu1 |      |          |
| India - states    | Survey       | Education edu3>edu2 | 100  | 0.001432 |
| India - MH and UP | Social media | Gender              | 90   | 0.422314 |
| India - MH and UP | Survey       | Gender              | 166  | 0.002135 |
| India - MH and UP | Social media | Age18>35            | 6    | 0.995184 |
| India - MH and UP | Social media | Age35>65            | 10   | 0.0625   |
| India - MH and UP | Survey       | Age18>35            | 121  | 0.017578 |
| India - MH and UP | Survey       | Age35>65            | 91   | 0.000737 |
| India - MH and UP | Social media | Education edu2>edu1 | 33   | 0.106762 |
| India - MH and UP | Social media | Education edu3>edu2 | 10   | 0.250092 |
| India - MH and UP | Survey       | Education edu2>edu1 | 33.5 | 0.962833 |
| India - MH and UP | Survey       | Education edu3>edu2 | 10   | 0.0328   |
| Mexico            | Social media | Gender              | 496  | 4.66E-10 |
| Mexico            | Survey       | Gender              | 273  | 0.055468 |
| Mexico            | Social media | Age18>35            | 11   | 1        |
| Mexico            | Social media | Age35>65            | 496  | 6.44E-07 |
| Mexico            | Survey       | Age18>35            | 270  | 0.063544 |
| Mexico            | Survey       | Age35>65            | 333  | 0.00027  |
| Mexico            | Social media | Education edu2>edu1 | 295  | 0.048166 |
| Mexico            | Social media | Education edu3>edu2 | 410  | 1.68E-06 |
| Mexico            | Survey       | Education edu2>edu1 | 375  | 4.49E-05 |
| Mexico            | Survey       | Education edu3>edu2 | 372  | 5.5E-06  |
